# Supplementary material for: Metal–organic frameworks (MOFs) of an MIL-101-supported iridium(iii) complex as efficient photocatalysts in the three-component alkoxycyanomethylation of alkenes
Source: Royal Society of Chemistry journal article supplement (doi:10.1039/d4dt02943g), 2024-11-22
Supplement: d4dt02943g1.pdf [file d4dt02943g1.pdf]

## Electronic Supplementary Information

Metal-organic frameworks (MOFs) of MIL-101-supported iridium(III)  
complex as an efficient photocatalyst in the three-component  
alkoxycyanomethylation of alkenes

Xintao Deng, Mi Zhou, Xuebing Ma\*

College of Chemistry and Chemical Engineering, Southwest University, Chongqing, 400715, P. R.  
China

Corresponding author's email: [zcj123@swu.edu.cn](mailto:zcj123@swu.edu.cn)

## 1. Particle size distribution

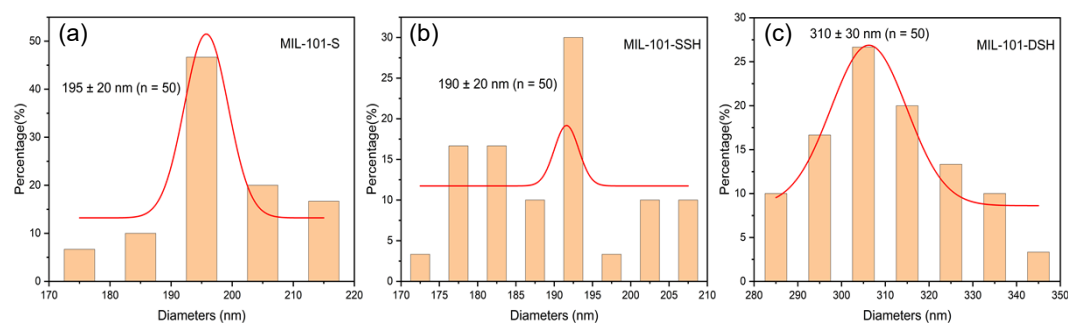

**Fig.S1** Particle size distributions of MIL-101-S (a) MIL-101-SSH (b) and MIL-101-DSH (C).

## 2. Porous structure

**Table S1** Specific surface areas, pore sizes, and pore volumes of various MIL-101 and Ir@MIL-101

| Sample         | $S_{\text{BET}}$ ( $\text{m}^2 \text{g}^{-1}$ ) | Pore size (nm) | Pore volume ( $\text{cm}^3 \text{g}^{-1}$ ) |
|----------------|-------------------------------------------------|----------------|---------------------------------------------|
| MIL-101-S      | 1362                                            | 3.1            | 0.80                                        |
| MIL-101-SSH    | 1078                                            | 3.1            | 0.71                                        |
| MIL-101-DSH    | 1174                                            | 3.1            | 0.74                                        |
| Ir@MIL-101-S   | 962                                             | 1.9            | 0.59                                        |
| Ir@MIL-101-SSH | 847                                             | 1.8            | 0.47                                        |
| Ir@MIL-101-DSH | 798                                             | 1.9            | 0.47                                        |

## 3. Content of chloromethyl in various chloromethylated MIL-101

**Table S2** Chloromethyl content of various chloromethylated MIL-101

| Entry       | $\text{AgNO}_3$ <sup>[a]</sup> (mL) | Chloromethyl content <sup>[b]</sup> ( $\text{mmol g}^{-1}$ ) |
|-------------|-------------------------------------|--------------------------------------------------------------|
| MIL-101-S   | 8.4                                 | 0.84                                                         |
| MIL-101-SSH | 9.2                                 | 0.92                                                         |
| MIL-101-DSH | 12.1                                | 1.21                                                         |

<sup>[a]</sup> Titration volume, <sup>[b]</sup> Calculated by titration volume of consumed  $\text{AgNO}_3$ .

## 4. Emission lifetime

The fluorescent lifetimes of all samples were determined by using time-correlated single-photon counting (TCSPC) in solid state. Their average emission lifetimes were calculated according to the following equation where  $\tau$  is measured fluorescence lifetime and B is amplitude. Fluorescence lifetimes including  $\tau_1$ ,  $\tau_2$ , and  $\tau_3$  are derived from first, second and third order fitting. Similarly,  $B_1$ ,  $B_2$ , and  $B_3$  are also obtained

$$\tau_{ave} = \frac{B_1\tau_1^2 + B_2\tau_2^2 + B_3\tau_3^2}{B_1\tau_1 + B_2\tau_2 + B_3\tau_3}$$

**Table S3** Fluorescence decay curve detailed fitting parameters of various Ir@MIL-101 and *fac*-Ir(ppy)<sub>3</sub>

| Sample                           | $\tau_1$ (ns) | $B_1/Rel_1$ (%) | $\tau_2$ (ns) | $B_2/Rel_2$ (%) | $\tau_3$ (ns) | $B_3/Rel_3$ (%) | $\tau_{avg}$ | $\chi^2$ |
|----------------------------------|---------------|-----------------|---------------|-----------------|---------------|-----------------|--------------|----------|
| <i>fac</i> -Ir(ppy) <sub>3</sub> | 44.41         | 133.9/-         | 245.62        | 774.5/-         | 555.24        | 550.6/-         | 431.80       | 1.08     |
| Ir@MIL-101(Cr)-S                 | 2.30          | 2903.43/15.42   | 5.88          | 3723.20/64.95   | 18.90         | 350.28/19.64    | 7.80         | 1.06     |
| Ir@MIL-101(Cr)-SSH               | 2.05          | 2874.95/13.09   | 7.52          | 3971.72/67.33   | 20.73         | 420.28/19.58    | 9.53         | 1.19     |
| Ir@MIL-101(Cr)-DSH               | 2.22          | 4132.62/15.58   | 9.25          | 3110.46/48.8    | 30.21         | 693.37/35.56    | 15.61        | 1.15     |

## 5. UV-Vis DRS

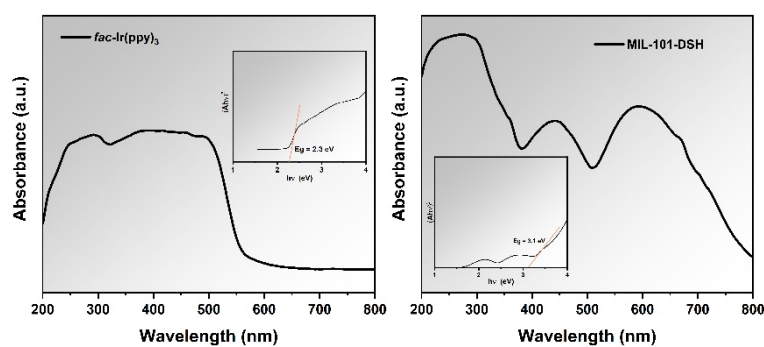

**Fig. S2** UV-Vis DRS spectra of *fac*-Ir(ppy)<sub>3</sub> and MIL-101-DSH

## 6. Quantum yield

Based on the fluorescence intensities in fluorescence spectra, the photoluminescence quantum yields were determined by FLS1000 steady state/transient state fluorescence spectrometer.

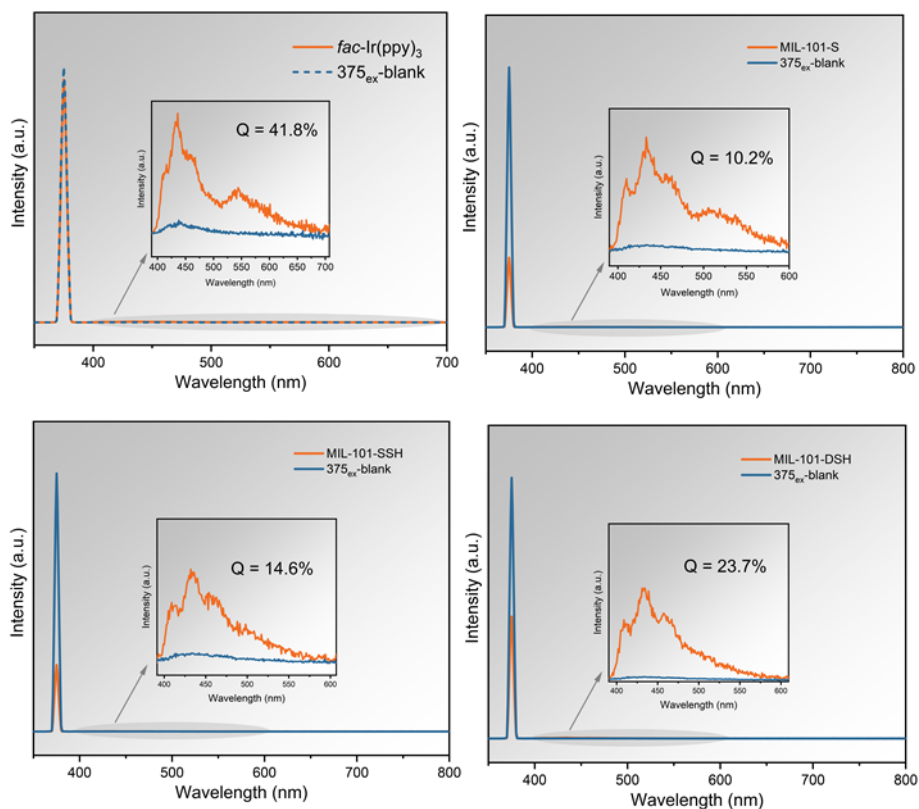

**Fig.S3** Photoluminescence quantum yields (PLQY) of *fac*-Ir(ppy)<sub>3</sub>, Ir@MIL-101-S Ir@MIL-101-SSH and Ir@MIL-101-DSH

## 7. Kinetics of reaction process

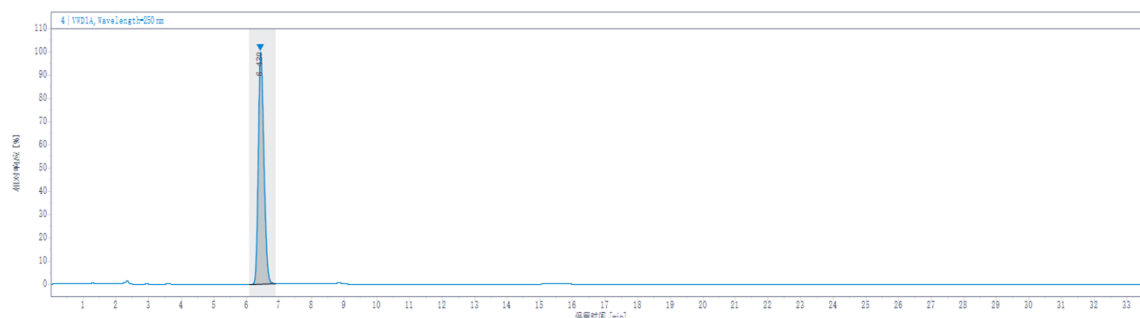

**Fig.S4** HPLC spectrum of the reaction mixture in the Ir@MIL-101-DSH-promoted reductive cross-coupling reaction of styrene, bromoacetonitrile and methanol at 24 h (rate: 0.8 mL min<sup>-1</sup>, V<sub>H<sub>2</sub>O</sub>/V<sub>H<sub>3</sub>CN</sub>=60:40, C18 column).

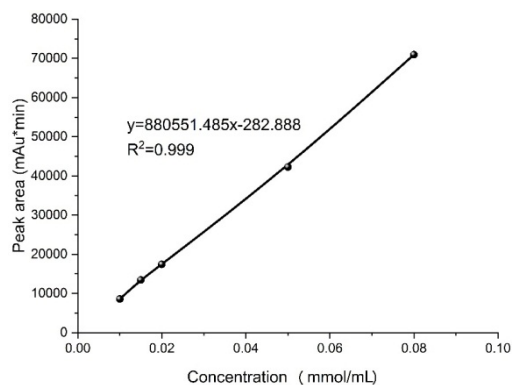

**Fig.S5** Standard curve for product quantification

**Table S4** Yields of  $\gamma$ -alkoxynitrile in the reaction of styrene, bromoacetonitrile and methanol during the whole processes

| Sample                           | Reaction time (h) |    |    |    |    |    |    |    |
|----------------------------------|-------------------|----|----|----|----|----|----|----|
|                                  | 3                 | 6  | 9  | 12 | 15 | 18 | 21 | 24 |
| <i>fac</i> -Ir(ppy) <sub>3</sub> | 13                | 34 | 47 | 59 | 73 | 79 | 87 | 87 |
| Ir@MIL-101-S                     | 6                 | 18 | 27 | 35 | 42 | 48 | 53 | 54 |
| Ir@MIL-101-SSH                   | 6                 | 25 | 32 | 41 | 53 | 59 | 65 | 67 |
| Ir@MIL-101(Cr)-DSH               | 6                 | 27 | 39 | 50 | 61 | 73 | 84 | 86 |

Reaction conditions: Ir@MIL-101 (0.5 mol% of Ir), styrene (52.5 mg, 0.5 mmol), bromoacetonitrile (120.0 mg, 1.0 mmol), NaHCO<sub>3</sub> (84.0 mg, 1.0 mmol), white light (24W)

### 8. XPS of 10<sup>th</sup>-reused Ir@MIL-101-DSH

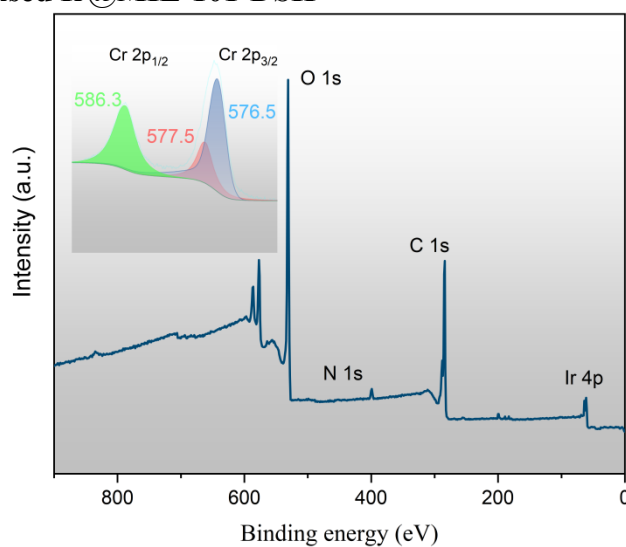

**Fig.S6** XPS spectrum of 10<sup>th</sup>-reused Ir@MIL-101-DSH

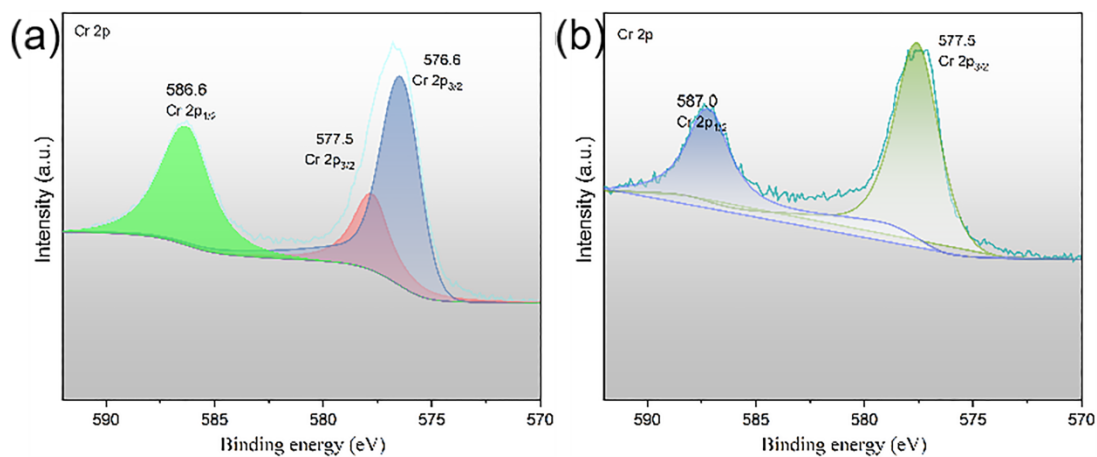

**Fig.S7** Comparative XPS spectra of Cr 2p for the fresh (b) and 10<sup>th</sup>-reused (a) Ir@MIL-101-DSH

## 8. <sup>1</sup>H NMR spectra of products

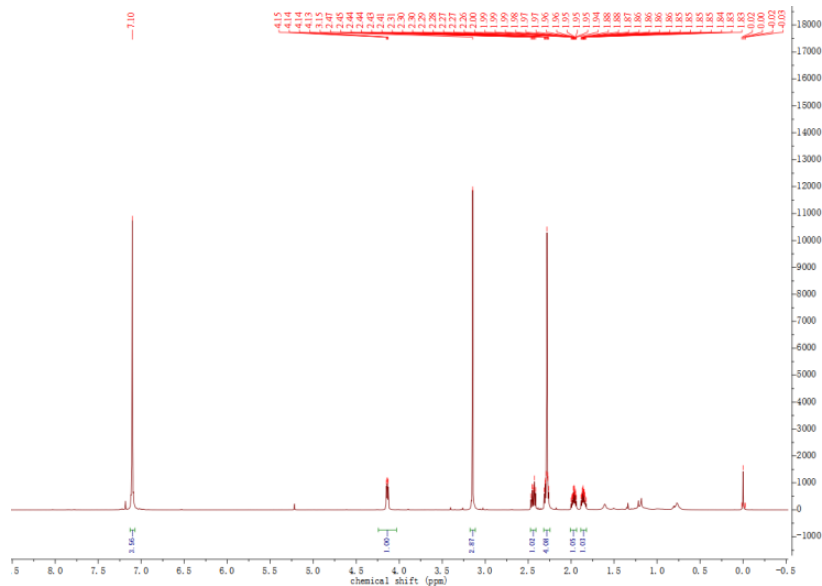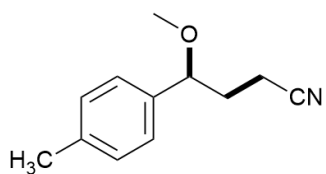

<sup>1</sup>H NMR (600 MHz, Chloroform-d)  $\delta$  7.10 (s, 4H), 4.14 (dd,  $J = 8.7, 4.7$  Hz, 1H), 3.15 (s, 3H), 2.44 (dt,  $J = 16.9, 7.7$  Hz, 1H), 2.32 – 2.24 (m, 4H), 2.01 – 1.93 (m, 1H), 1.89 – 1.83 (m, 1H).

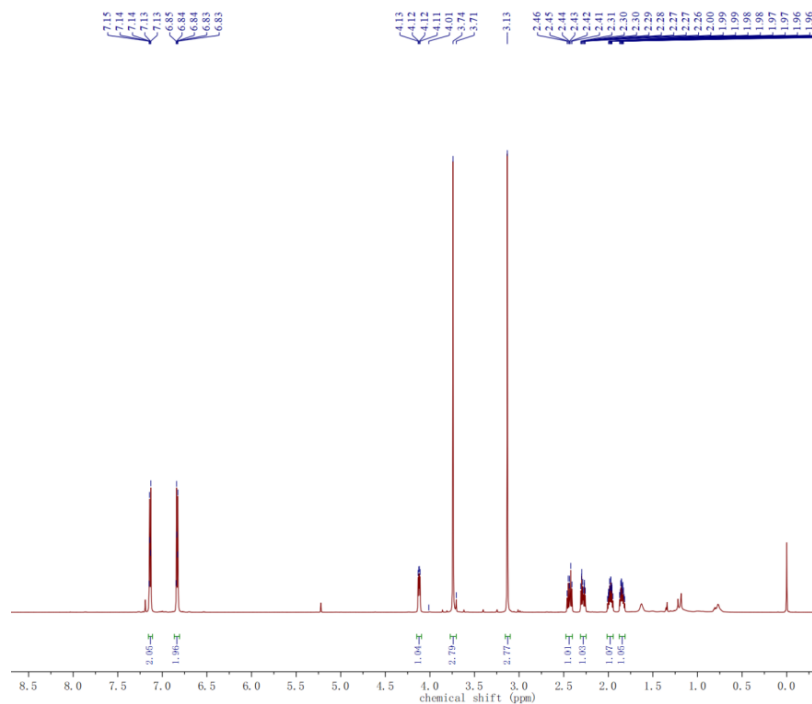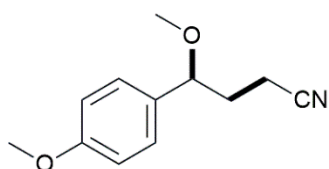

$^1\text{H NMR}$  (600 MHz, Chloroform- $d$ )  $\delta$  7.18 – 7.02 (m, 2H), 6.89 – 6.74 (m, 2H), 4.12 (dd,  $J = 8.7, 4.8$  Hz, 1H), 3.74 (s, 3H), 3.13 (s, 3H), 2.43 (dt,  $J = 17.1, 7.6$  Hz, 1H), 2.28 (ddd,  $J = 16.9, 7.3, 5.9$  Hz, 1H), 2.02 – 1.94 (m, 1H), 1.88 – 1.80 (m, 1H).

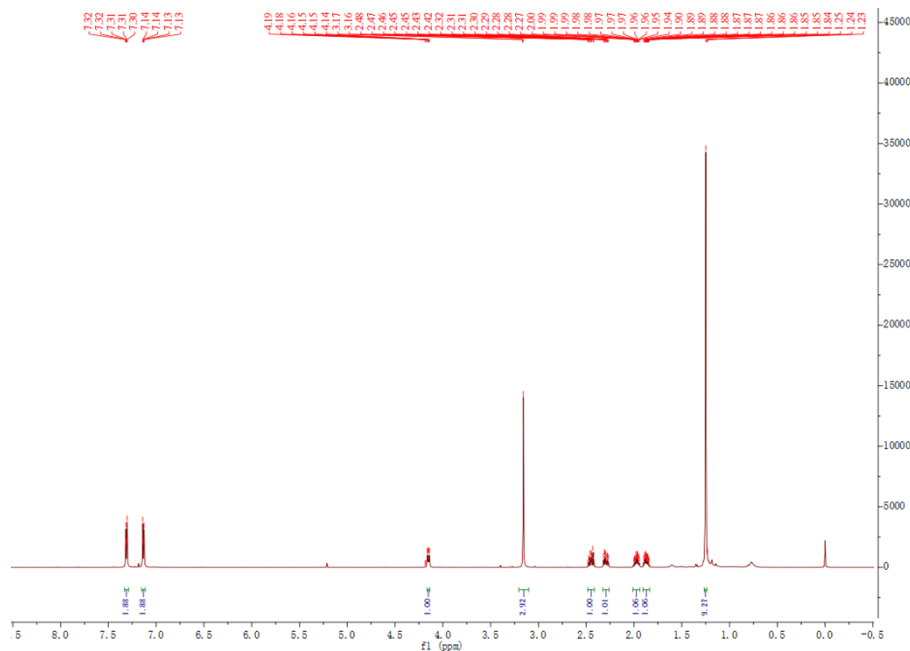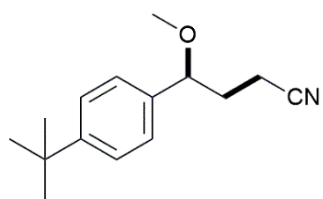

$^1\text{H NMR}$  (600 MHz, Chloroform- $d$ )  $\delta$  7.33 – 7.29 (m, 2H), 7.15 – 7.11 (m, 2H), 4.15 (dd,  $J = 8.7, 4.7$  Hz, 1H), 3.16 (s, 3H), 2.45 (dt,  $J = 16.9, 7.7$  Hz, 1H), 2.29 (ddd,  $J = 16.9, 7.4, 5.8$  Hz, 1H), 2.01 – 1.94 (m, 1H), 1.90 – 1.84 (m, 1H), 1.25 (s, 10H).?

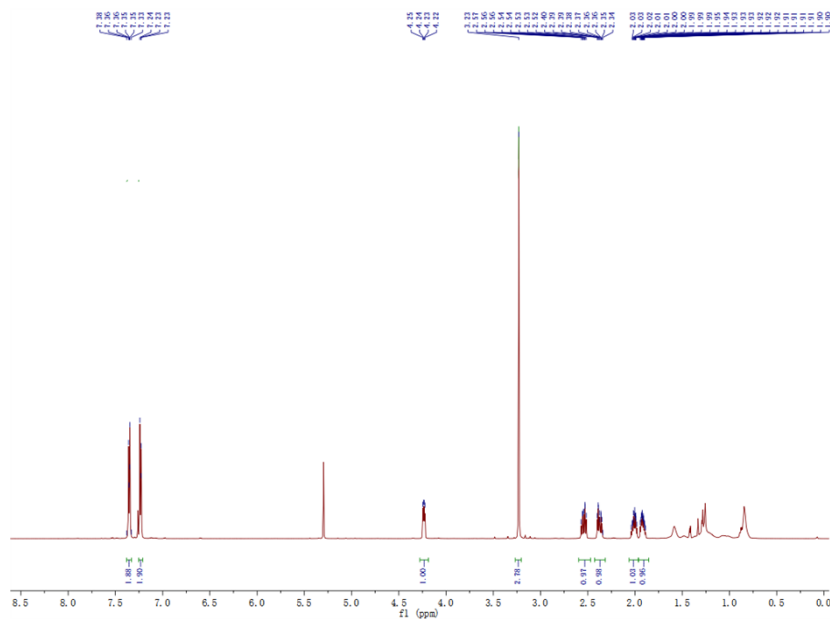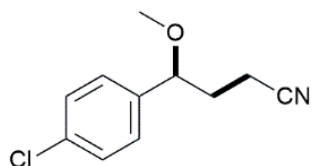

$^1\text{H}$  NMR (600 MHz, Chloroform-d)  $\delta$  7.40 – 7.32 (m, 2H), 7.23 (d,  $J$  = 8.4 Hz, 2H), 4.23 (dd,  $J$  = 9.0, 4.5 Hz, 1H), 3.23 (s, 3H), 2.58 – 2.50 (m, 1H), 2.37 (ddd,  $J$  = 16.9, 7.1, 5.7 Hz, 1H), 2.06 – 1.97 (m, 1H), 1.95 – 1.88 (m, 1H).

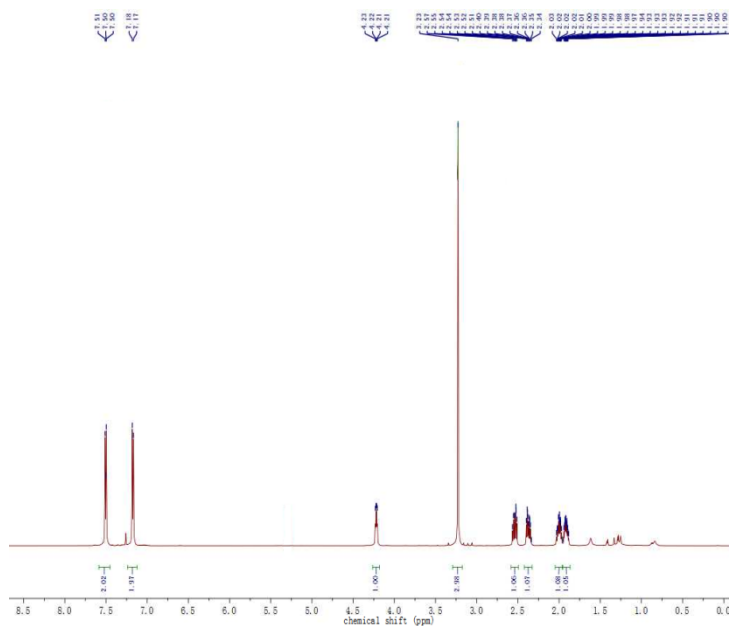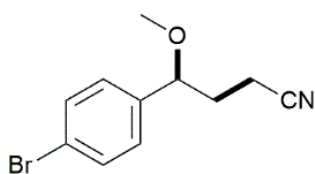

$^1\text{H}$  NMR (600 MHz, Chloroform-d)  $\delta$  7.50 (d,  $J$  = 8.3 Hz, 2H), 7.17 (d,  $J$  = 8.2 Hz, 2H), 4.22 (dd,  $J$  = 9.0, 4.5 Hz, 1H), 3.23 (s, 3H), 2.58 – 2.50 (m, 1H), 2.37 (ddd,  $J$  = 16.9, 7.1, 5.8 Hz, 1H), 2.05 – 1.96 (m, 1H), 1.93 – 1.88 (m, 1H).



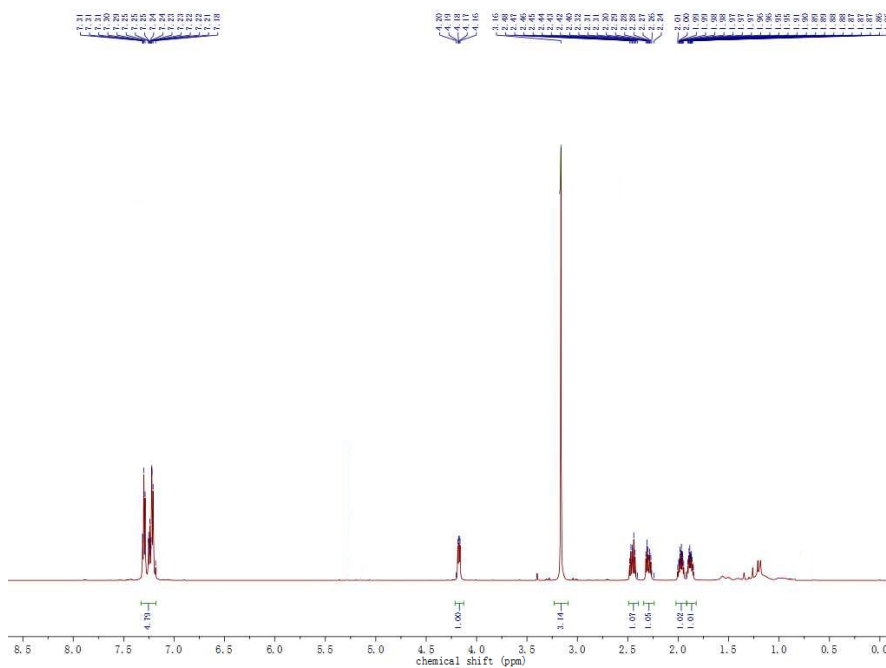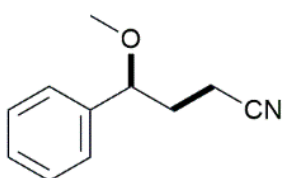

$^1\text{H}$  NMR (600 MHz, Chloroform- $d$ )  $\delta$  7.37 – 7.14 (m, 5H), 4.17 (dd,  $J$  = 8.7, 4.6 Hz, 1H), 3.16 (s, 3H), 2.46 (dt,  $J$  = 16.5, 7.7 Hz, 1H), 2.30 (ddd,  $J$  = 16.8, 7.3, 5.8 Hz, 1H), 2.02 – 1.93 (m, 1H), 1.92 – 1.83 (m, 1H).

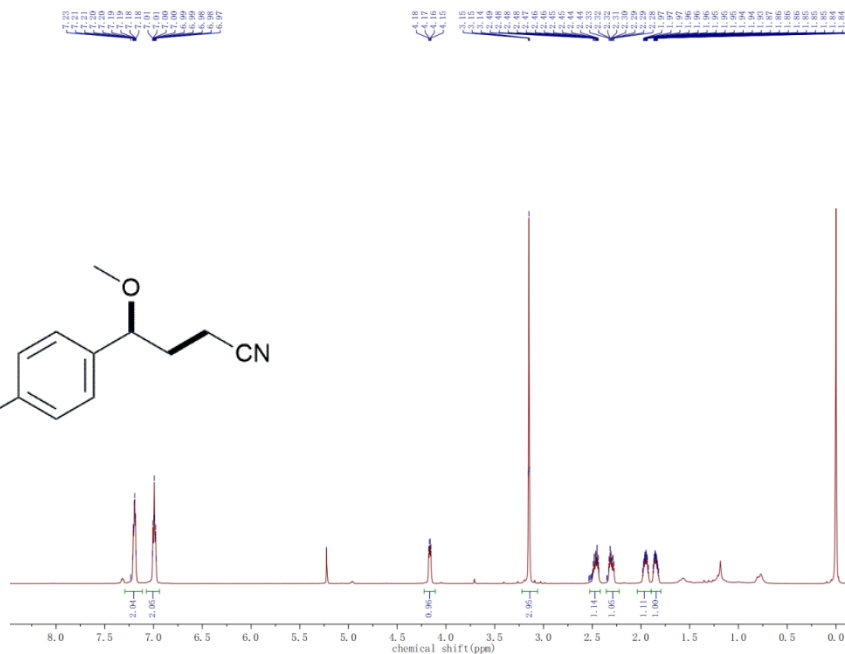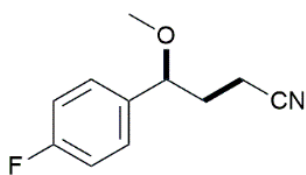

$^1\text{H}$  NMR (600 MHz, Chloroform- $d$ )  $\delta$  7.20 (ddt,  $J$  = 8.3, 5.2, 2.9 Hz, 3H), 6.99 (tt,  $J$  = 9.8, 2.9 Hz, 3H), 4.17 (dd,  $J$  = 8.9, 4.5 Hz, 1H), 3.15 (d,  $J$  = 3.5 Hz, 4H), 2.51 – 2.43 (m, 2H), 2.33 – 2.27 (m, 0H), 1.98 – 1.93 (m, 1H), 1.90 – 1.80 (m, 1H).
